# Supplementary material for: Main-chain liquid crystalline copolyesters with a phosphorus-containing non-coplanar moiety
Source: Royal Society of Chemistry journal article supplement (doi:10.1039/c2py20579c), 2012-08-24
Supplement: c2py20579c.pdf [file c2py20579c.pdf]

## Supporting information

### Main-chain liquid crystalline copolyesters with a phosphorus-containing non-coplanar moiety

Rong Yang, Li Chen\*, Rui Jin and Yu-Zhong Wang\*

*Center for Degradable and Flame-Retardant Polymeric Materials, College of Chemistry, State Key Laboratory of Polymer Materials Engineering, National Engineering Laboratory of Eco-Friendly Polymeric Materials (Sichuan), Sichuan University, Chengdu 610064, China. E-mail: l.chen.scu@gmail.com (L Chen), yzwang@scu.edu.cn (YZ Wang); Fax: +86-28-85410755*

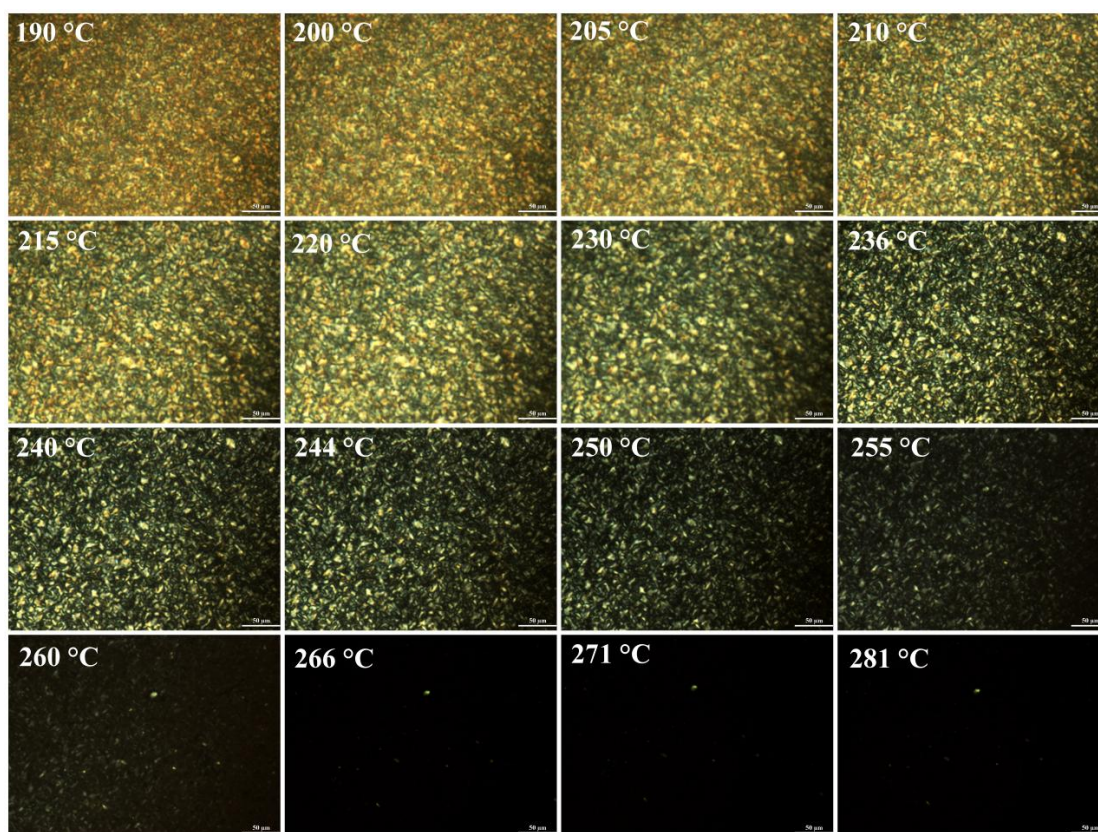

**Fig. S1** Polarized optical microscope photographs of PDPBP5 obtained at different temperatures during heating (magnification 500 ×).
